# Supplementary material for: Retroreflection-based sandwich type affinity sensing of isothermal gene amplification products for foodborne pathogen detection
Source: Royal Society of Chemistry journal article supplement (doi:10.1039/d1an01543e), 2021-12-10
Supplement: d1an01543e1.pdf [file d1an01543e1.pdf]

1

## Supplementary information

2

3

4

5

### **Retroreflection-based sandwich type affinity sensing of**

6

### **isothermal gene amplification product for foodborne pathogen**

7

### **detection**

8

9

10

11 Danbi Lee, Eunsuk Kim, Kyung Won Lee, Ka Ram Kim, Hyeong Jin Chun, Hyunjin Yoon, Hyun C. Yoon\*

12

13 *Department of Molecular Science and Technology, Ajou University, Suwon 443749, South Korea*

14

15

16

17

18

19 \* Author to whom correspondence should be addressed:

20 **E-mail:** [hcyoon@ajou.ac.kr](mailto:hcyoon@ajou.ac.kr)

1 **Figure S1.** Outline of the LAMP reaction. (A) The general amplification process producing  
 2 concatemers of various sizes and shapes. (B) The amplification process generating double-  
 3 stranded detectable amplicon using specially designed primers.  
 4

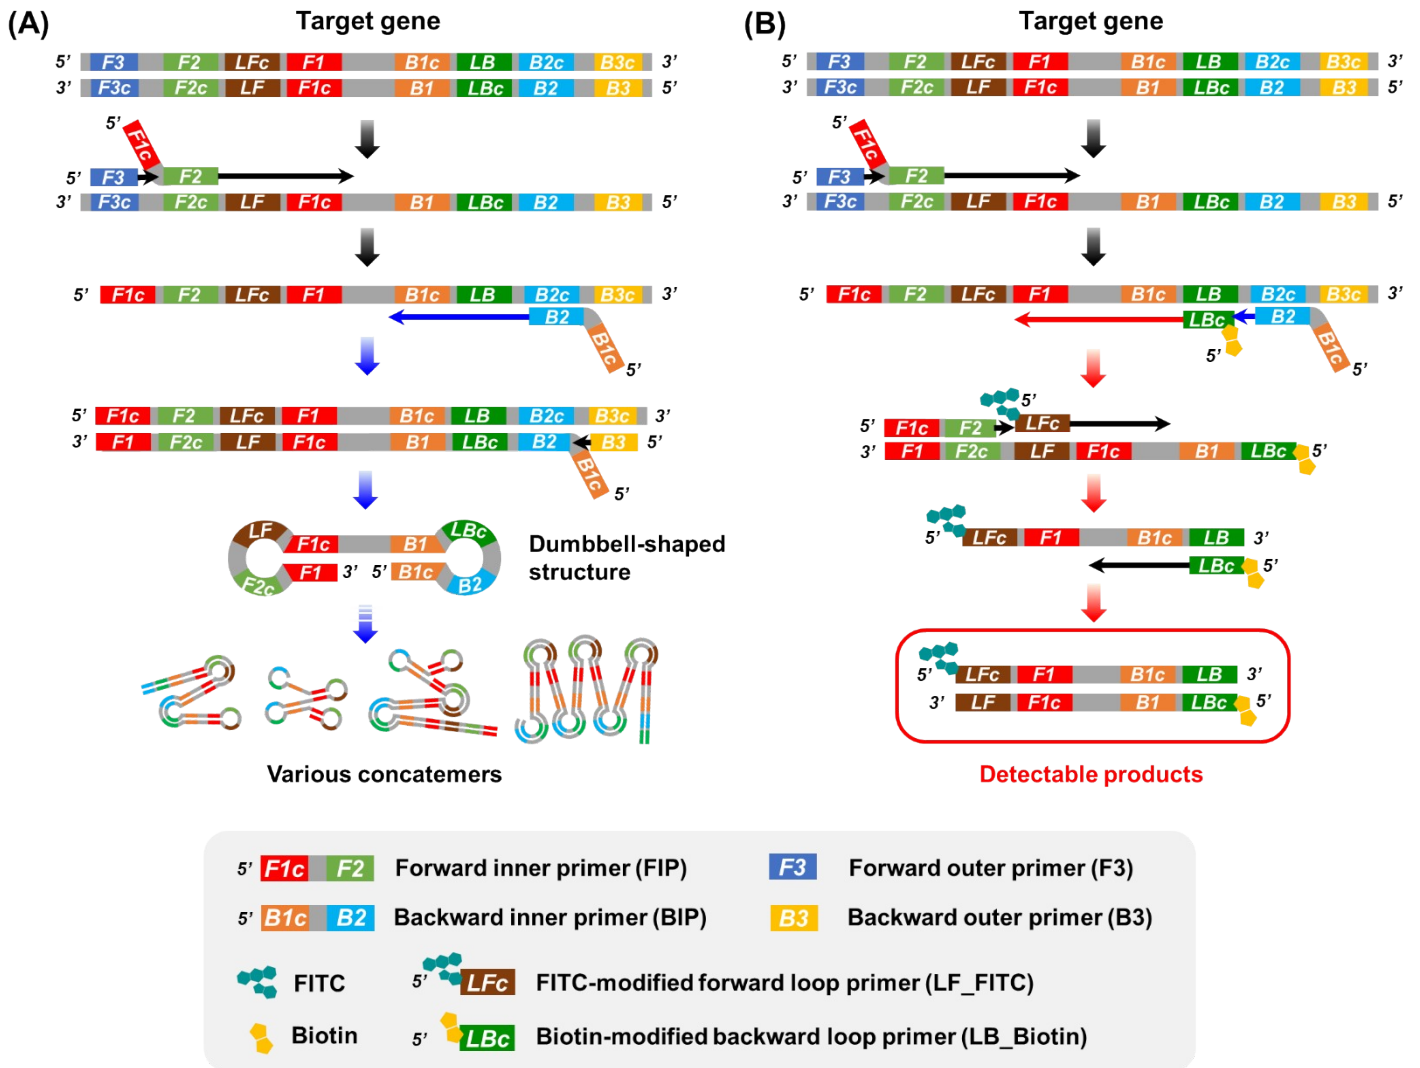

1 **Figure S2.** Confirmation of streptavidin conjugation of the RJPs for target-specific detection.

2 The image on the left shows the result of SA-RJP and the image on the right shows the result

3 of EA-RJP.

4

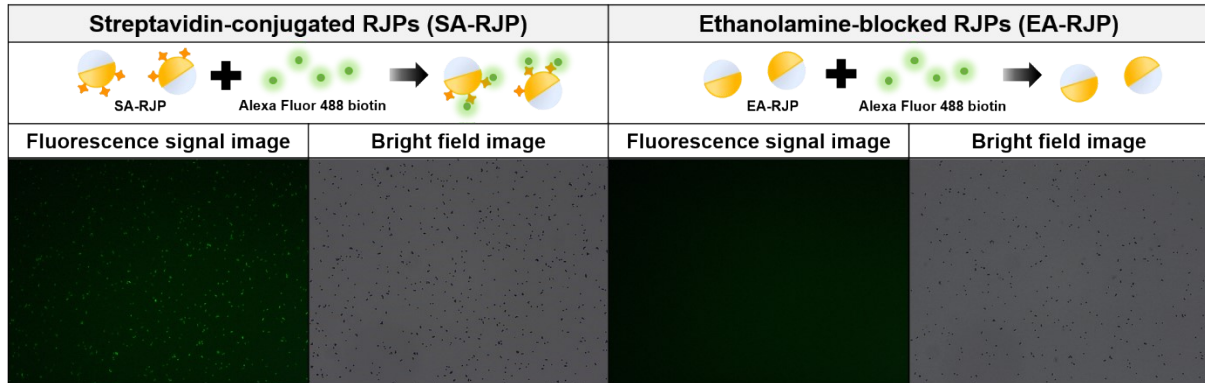

5

6

1 **Figure S3.** Confirmation of the possibility of quantitative analysis of target amplicons. (A)  
 2 Workflow of the detection procedure of the double-stranded target amplicons using SAPE and  
 3 anti-FITC antibody-modified sensing surface. (B) The result images of the sensing surface after  
 4 the assay observed with fluorescence microscopy. (C) The graph represents the quantification  
 5 of the fluorescence intensity in the resulting image using the ImageJ software program.

6

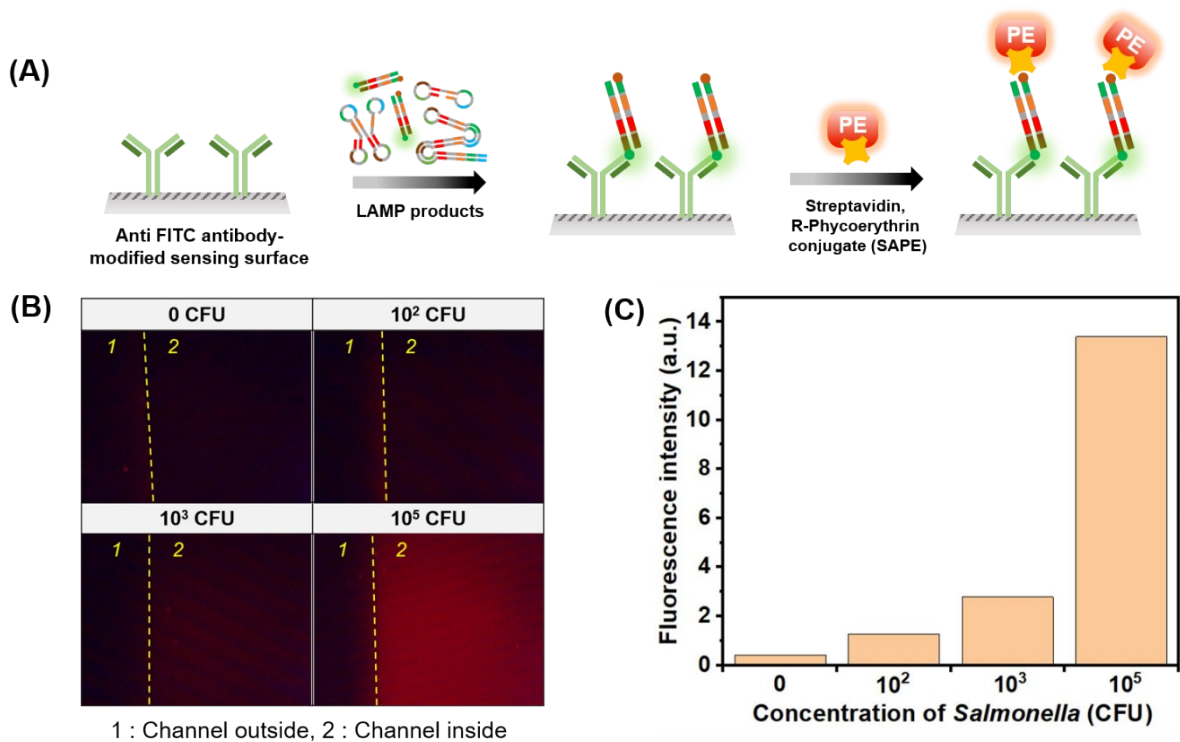

7

8

1 **Table S1.** Comparison of analytical performances for detection of *Salmonella*.

| <b>Methods</b>      | <b>Detection limit<br/>(CFU/mL)</b> | <b>Linear Range<br/>(CFU/mL)</b>     | <b>References</b> |
|---------------------|-------------------------------------|--------------------------------------|-------------------|
| ELISA               | 10 <sup>4</sup>                     | 10 <sup>4</sup> -10 <sup>8</sup>     | [1]               |
| SPR                 | 60                                  | 10 <sup>2</sup> -10 <sup>7</sup>     | [2]               |
| SERS                | 35                                  | 10 <sup>2</sup> -10 <sup>7</sup>     | [3]               |
| Fluorescent         | 5×10 <sup>3</sup>                   | 5×10 <sup>4</sup> -1×10 <sup>7</sup> | [4]               |
| Fluorescent         | 6                                   | 10 <sup>2</sup> -10 <sup>6</sup>     | [5]               |
| Colorimetric        | 10 <sup>5</sup>                     | 10 <sup>6</sup> -10 <sup>8</sup>     | [6]               |
| Colorimetric        | 14                                  | 10-10 <sup>7</sup>                   | [7]               |
| Electrochemical     | 8                                   | 9.6-9.6×10 <sup>4</sup>              | [8]               |
| Magnetic relaxation | 20                                  | 10 <sup>3</sup> -10 <sup>7</sup>     | [9]               |
| PCR                 | 2-3                                 | 10-10 <sup>5</sup>                   | [10]              |
| HDA                 | 10 <sup>2</sup>                     | NA                                   | [11]              |
| RPA                 | 10 <sup>2</sup>                     | NA                                   | [12]              |
| LAMP                | 10 <sup>2</sup>                     | 10 <sup>2</sup> -10 <sup>7</sup>     | [13]              |
| LAMP                | 10                                  | 10-10 <sup>6</sup>                   | This biosensor    |

2 ELISA: enzyme-linked immunosorbent assay, SPR: surface plasmon resonance, SERS: surface-  
3 enhanced Raman scattering, PCR: polymerase chain reaction, HDA: helicase-dependent amplification,  
4 RPA: recombinase polymerase amplification, LAMP: loop-mediated isothermal amplification

5

6

## 1 References

2

- 3 1 W. Chunglok, D. K. Wuragil, S. Oaew, M. Somasundrum and W. Surareungchai,  
4 *Biosens. Bioelectron.*, 2011, **26**, 3584–3589.
- 5 2 P. Lei, H. Tang, S. Ding, X. Ding, D. Zhu, B. Shen, Q. Cheng and Y. Yan, *Microchim.*  
6 *Acta*, 2015, **182**, 289–296.
- 7 3 X. Xu, X. Ma, H. Wang and Z. Wang, *Microchim. Acta*, 2018, **185**, 325.
- 8 4 J. Hu, F. Tang, Y. Z. Jiang and C. Liu, *Analyst*, 2020, **145**, 2184–2190.
- 9 5 L. Zhuang, J. Gong, Y. Ji, P. Tian, F. Kong, H. Bai, N. Gu and Y. Zhang, *Analyst*,  
10 2020, **145**, 2367–2377.
- 11 6 W. H. Wu, M. Li, Y. Wang, H. X. Ouyang, L. Wang, X. C. Li, Y. C. Cao, Q. H. Meng  
12 and J. X. Lu, *Nanoscale Res. Lett.*, 2012, **7**, 1–7.
- 13 7 W. Qi, L. Zheng, S. Wang, F. Huang, Y. Liu, H. Jiang and J. Lin, *Biosens.*  
14 *Bioelectron.*, 2021, **178**, 113020.
- 15 8 Y. Ye, W. Yan, Y. Liu, S. He, X. Cao, X. Xu, H. Zheng and S. Gunasekaran, *Anal.*  
16 *Chim. Acta*, 2019, **1074**, 80–88.
- 17 9 Z. Wang, Y. Xianyu, Z. Zhang, A. Guo, X. Li, Y. Dong and Y. Chen, *ACS Sensors*,  
18 2019, **4**, 2771–2777.
- 19 10 A. C. Vinayaka, T. A. Ngo, K. Kant, P. Engelsmann, V. P. Dave, M. A. Shahbazi, A.  
20 Wolff and D. D. Bang, *Biosens. Bioelectron.*, 2019, **129**, 224–230.
- 21 11 R. Tang, H. Yang, Y. Gong, M. L. You, Z. Liu, J. R. Choi, T. Wen, Z. Qu, Q. Mei and  
22 F. Xu, *Lab Chip*, 2017, **17**, 1270–1279.
- 23 12 H. Ahn, B. S. Batule, Y. Seok and M. G. Kim, *Anal. Chem.*, 2018, **90**, 10211–10216.
- 24 13 H. J. Chun, S. Kim, Y. D. Han, K. R. Kim, J. H. Kim, H. Yoon and H. C. Yoon, *ACS*  
25 *Sensors*, 2018, **3**, 2261–2268.

26

27
